# Supplementary material for: The gonadal niche safeguards human fetal germline cell development following maternal SARS-CoV-2 infection
Source: PubMed Central journal article supplement (PMC11148563; doi:10.1016/j.xcrm.2024.101515), 2024-04-16
Supplement: mmc1.pdf [file mmc1.pdf]

**Cell Reports Medicine, Volume 5**

**Supplemental information**

**The gonadal niche safeguards**

**human fetal germline cell development**

**following maternal SARS-CoV-2 infection**

**Shijun Shen, Mengting Wang, Xiaocui Li, Beiyang Wang, Wei Hong, Wei Li, Ben Xu, Zhenxiang Guo, Ruichen Han, Shanru Yi, Zhiping Wu, Xiaoying He, Liping Wang, Qianshu Zhu, Guang Yang, Hong Wang, Qiaolin Deng, Jiayu Chen, Shaorong Gao, Cizhong Jiang, and Rui Gao**

**Document S1. Figure S1-S6, related to Figure 1-4.**

Figure S1. Isolation of human FGCs and gonadal somatic cells by FACS following maternal SARS-CoV-2 infection, related to Figure 1.

Figure S2. Expression pattern of human FGCs following maternal SARS-CoV-2 infection, related to Figure 2, 3.

Figure S3. DNA methylation pattern of human FGCs and gonadal somatic cells following maternal SARS-CoV-2 infection, related to Figure 2, 3.

Figure S4. DNA methylation reprogramming faithfully maintained in human FGCs following maternal SARS-CoV-2 infection, related to Figure 3.

Figure S5. Extensive immune responses in gonadal niche shield FGCs from maternal SARS-CoV-2 infection, related to Figure 4.

Figure S6. Human FGC-niche communication was not compromised following maternal SARS-CoV-2 infection, related to Figure 4.

A

| Patient ID | Maternal SARS-CoV-2 status | Gender | Gestational age at infection | Gestational age at termination | hFGC          |          | Soma          |          |
|------------|----------------------------|--------|------------------------------|--------------------------------|---------------|----------|---------------|----------|
|            |                            |        |                              |                                | Total RNA-seq | WGBS-seq | Total RNA-seq | WGBS-seq |
| P1         | Maternal exposed (CoV)     | Female | 4W                           | 11W                            | ✓             |          | ✓             |          |
| P2         | Maternal exposed (CoV)     | Female | 3W                           | 11W                            | ✓             |          | ✓             |          |
| P3         | Maternal exposed (CoV)     | Female | 3W                           | 11W                            | ✓             |          | ✓             |          |
| P4         | Maternal exposed (CoV)     | Female | 4D                           | 12W                            | ✓             |          | ✓             |          |
| P5         | Maternal exposed (CoV)     | Female | 5W                           | 13W                            | ✓             |          | ✓             |          |
| P6         | Maternal exposed (CoV)     | Female | 2W                           | 13W                            | ✓             | ✓        | ✓             |          |
| P7         | Maternal exposed (CoV)     | Female | 5W                           | 15W                            | ✓             |          | ✓             | ✓        |
| P8         | Uninfected (Ctrl)          | Female | N/A                          | 11W                            | ✓             |          | ✓             |          |
| P9         | Uninfected (Ctrl)          | Female | N/A                          | 11W                            | ✓             |          | ✓             |          |
| P10        | Uninfected (Ctrl)          | Female | N/A                          | 12W                            | ✓             |          | ✓             |          |
| P11        | Uninfected (Ctrl)          | Female | N/A                          | 14W                            | ✓             |          | ✓             |          |
| P12        | Uninfected (Ctrl)          | Female | N/A                          | 16W                            | ✓             |          | ✓             |          |
| P13        | Maternal exposed (CoV)     | Male   | 4W                           | 10W                            | ✓             |          | ✓             |          |
| P14        | Maternal exposed (CoV)     | Male   | 2W                           | 11W                            | ✓             |          | ✓             |          |
| P15        | Maternal exposed (CoV)     | Male   | 4W                           | 11W                            | ✓             |          | ✓             |          |
| P16        | Maternal exposed (CoV)     | Male   | 7W                           | 11W                            | ✓             |          | ✓             |          |
| P17        | Maternal exposed (CoV)     | Male   | 3W                           | 12W                            | ✓             | ✓        | ✓             | ✓        |
| P18        | Maternal exposed (CoV)     | Male   | 2W                           | 12W                            | ✓             | ✓        | ✓             | ✓        |
| P19        | Maternal exposed (CoV)     | Male   | 5W                           | 13W                            | ✓             |          | ✓             |          |
| P20        | Maternal exposed (CoV)     | Male   | 5W                           | 14W                            | ✓             |          | ✓             |          |
| P21        | Maternal exposed (CoV)     | Male   | 5W                           | 15W                            | ✓             |          | ✓             |          |
| P22        | Maternal exposed (CoV)     | Male   | 2W                           | 15W                            | ✓             |          | ✓             |          |
| P23        | Maternal exposed (CoV)     | Male   | 9W                           | 17W                            | ✓             |          | ✓             |          |
| P24        | Uninfected (Ctrl)          | Male   | N/A                          | 10W                            | ✓             |          | ✓             |          |
| P25        | Uninfected (Ctrl)          | Male   | N/A                          | 12W                            | ✓             |          | ✓             |          |
| P26        | Uninfected (Ctrl)          | Male   | N/A                          | 12W                            | ✓             |          | ✓             |          |
| P27        | Uninfected (Ctrl)          | Male   | N/A                          | 11W                            | ✓             |          | ✓             |          |
| P28        | Uninfected (Ctrl)          | Male   | N/A                          | 11W                            |               | ✓        |               | ✓        |
| P29        | Uninfected (Ctrl)          | Female | N/A                          | 13W                            |               | ✓        |               | ✓        |

D, day. W, week. N/A, not available.

B

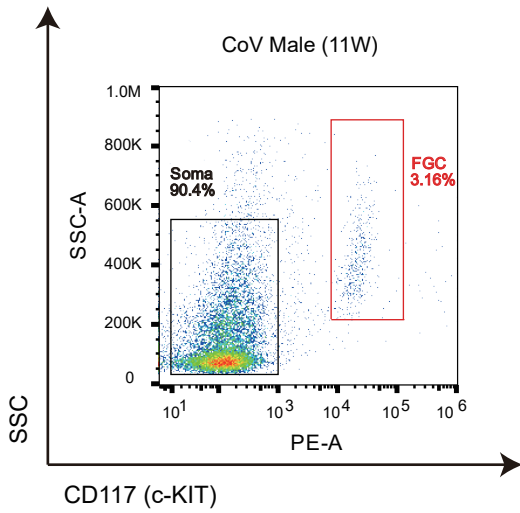

C

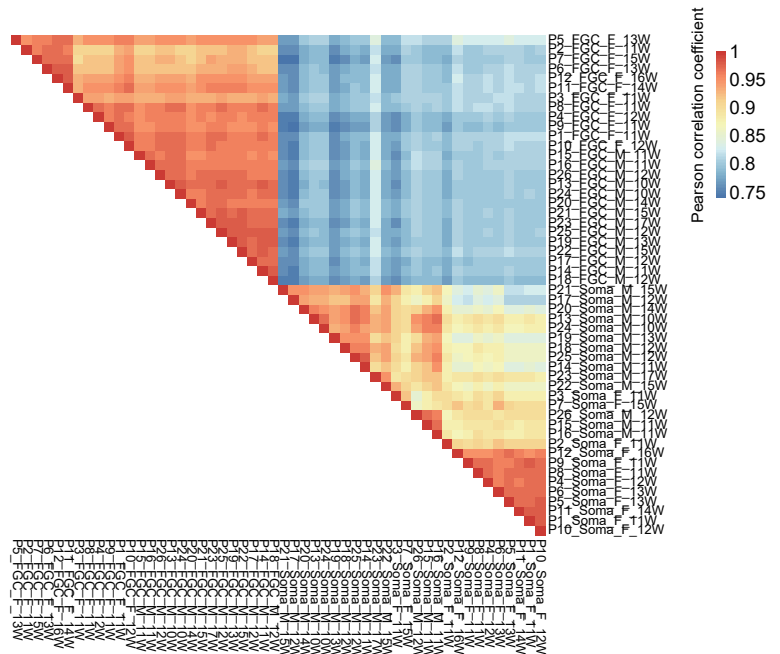

Figure S1

**Figure S1. Isolation of human FGCs and gonadal somatic cells by FACS following maternal SARS-CoV-2 infection, related to Figure 1.**

**(A)** Details of samples collected from developing fetuses for total RNA-seq or WGBS-seq. D, day. W, week. N/A, not available.

**(B)** Representative FACS images from one 11W male gonad following maternal infection. W, gestational week at termination.

**(C)** Heatmap showing Pearson correlation coefficients of all transcriptomes. F, female. M, male. W, gestational week at termination.

**A**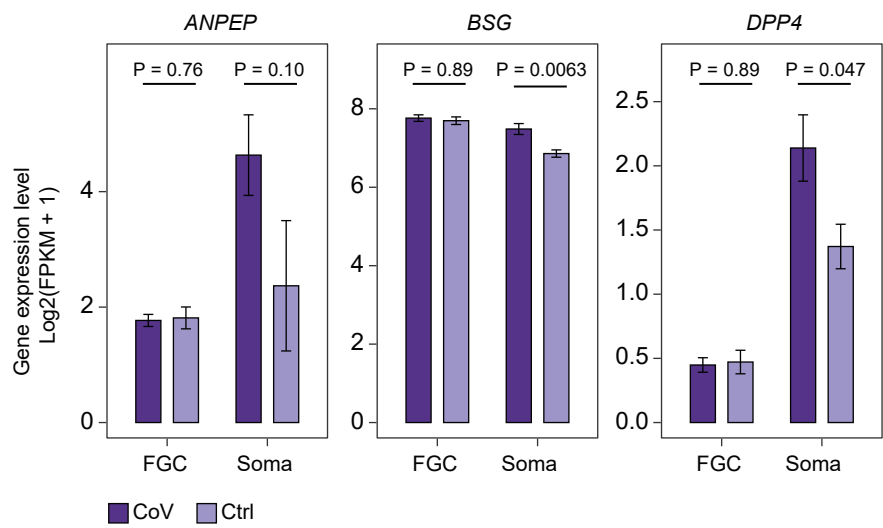**F**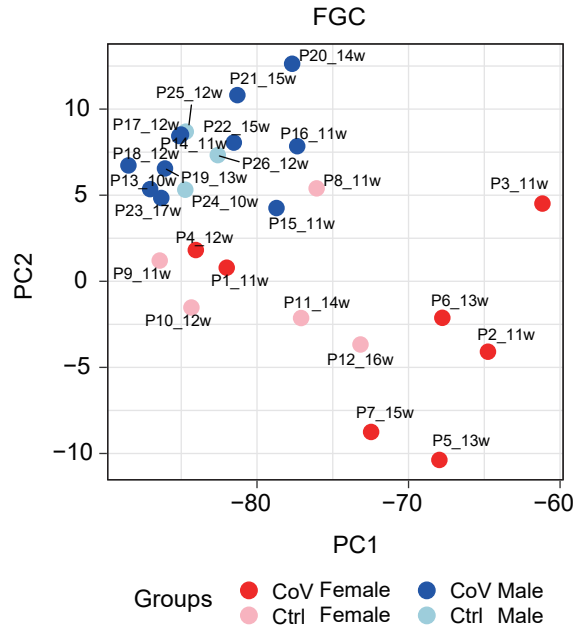**B**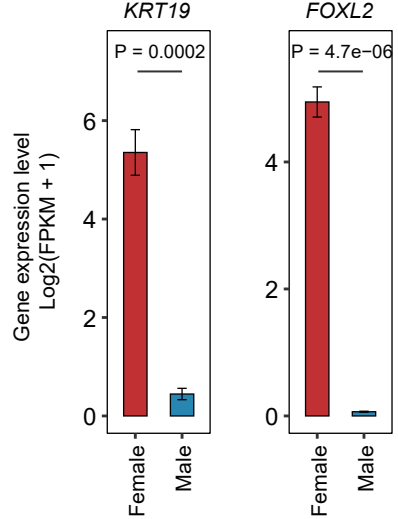**C**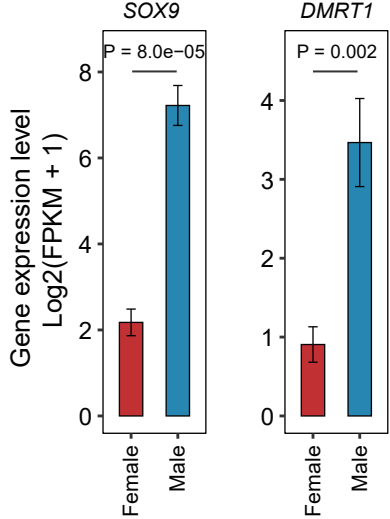**D**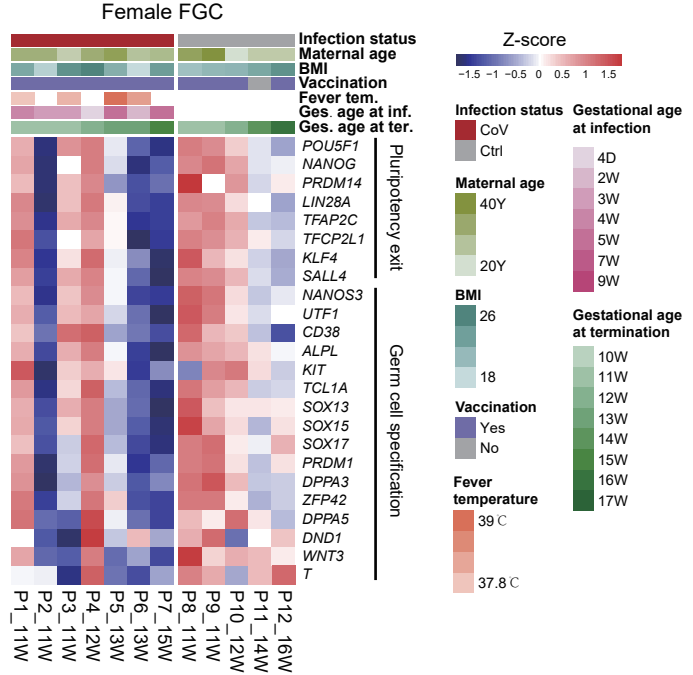**E**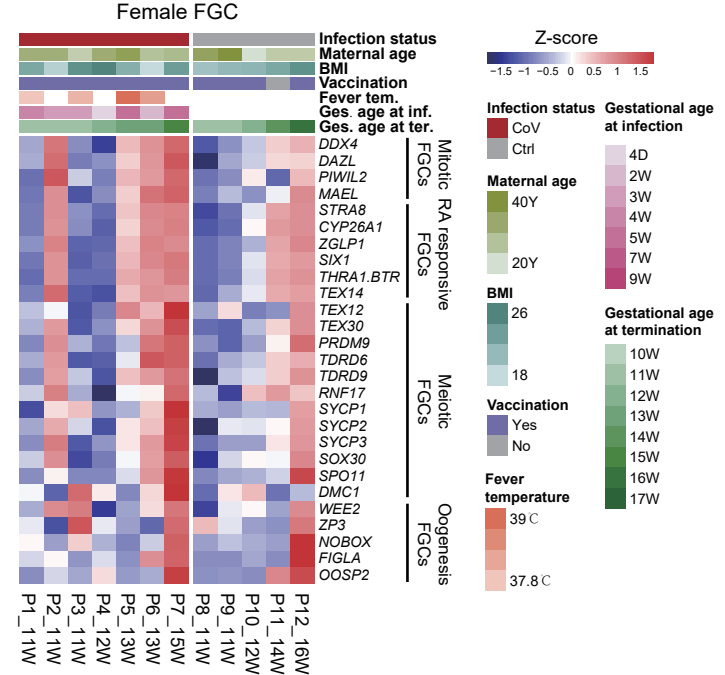

Figure S2

**Figure S2. Expression pattern of human FGCs following maternal SARS-CoV-2 infection, related to Figure 2, 3.**

**(A)** Expression level of selected SCARFs (SARS-CoV-2- and coronavirus-associated receptors and factors) in FGCs and gonadal somatic cells. The expression level was represented as  $\log_2(\text{FPKM}+1)$ . P values were calculated by Wilcoxon rank sum test. CoV\_n = 18, Ctrl\_n = 8.

**(B and C)** Bar plots showing expression level of selected female (B) and male (C) gonadal somatic marker genes. The expression level was represented as  $\log_2(\text{FPKM}+1)$ . The Student's *t*-test was performed to examine the statistical difference between female and male in Ctrl group. Red color scheme, female. Blue color scheme, male. Ctrl\_Female\_n = 5, Ctrl\_Male\_n = 3.

**(D and E)** Comparison of the expression level of early (D) or late (E) germline specific marker genes of female FGCs between CoV and Ctrl group. The expression level was Z-scored. The clinical characteristics of these samples were shown above correspondingly. Y, year. W, week. D, day. The heatmaps were ordered by gestational age at termination horizontally in each infection status.

**(F)** Principal component analysis (PCA) of the transcriptome of FGCs from CoV and Ctrl group. Red color scheme, female. Blue color scheme, male. W, gestational week at termination.

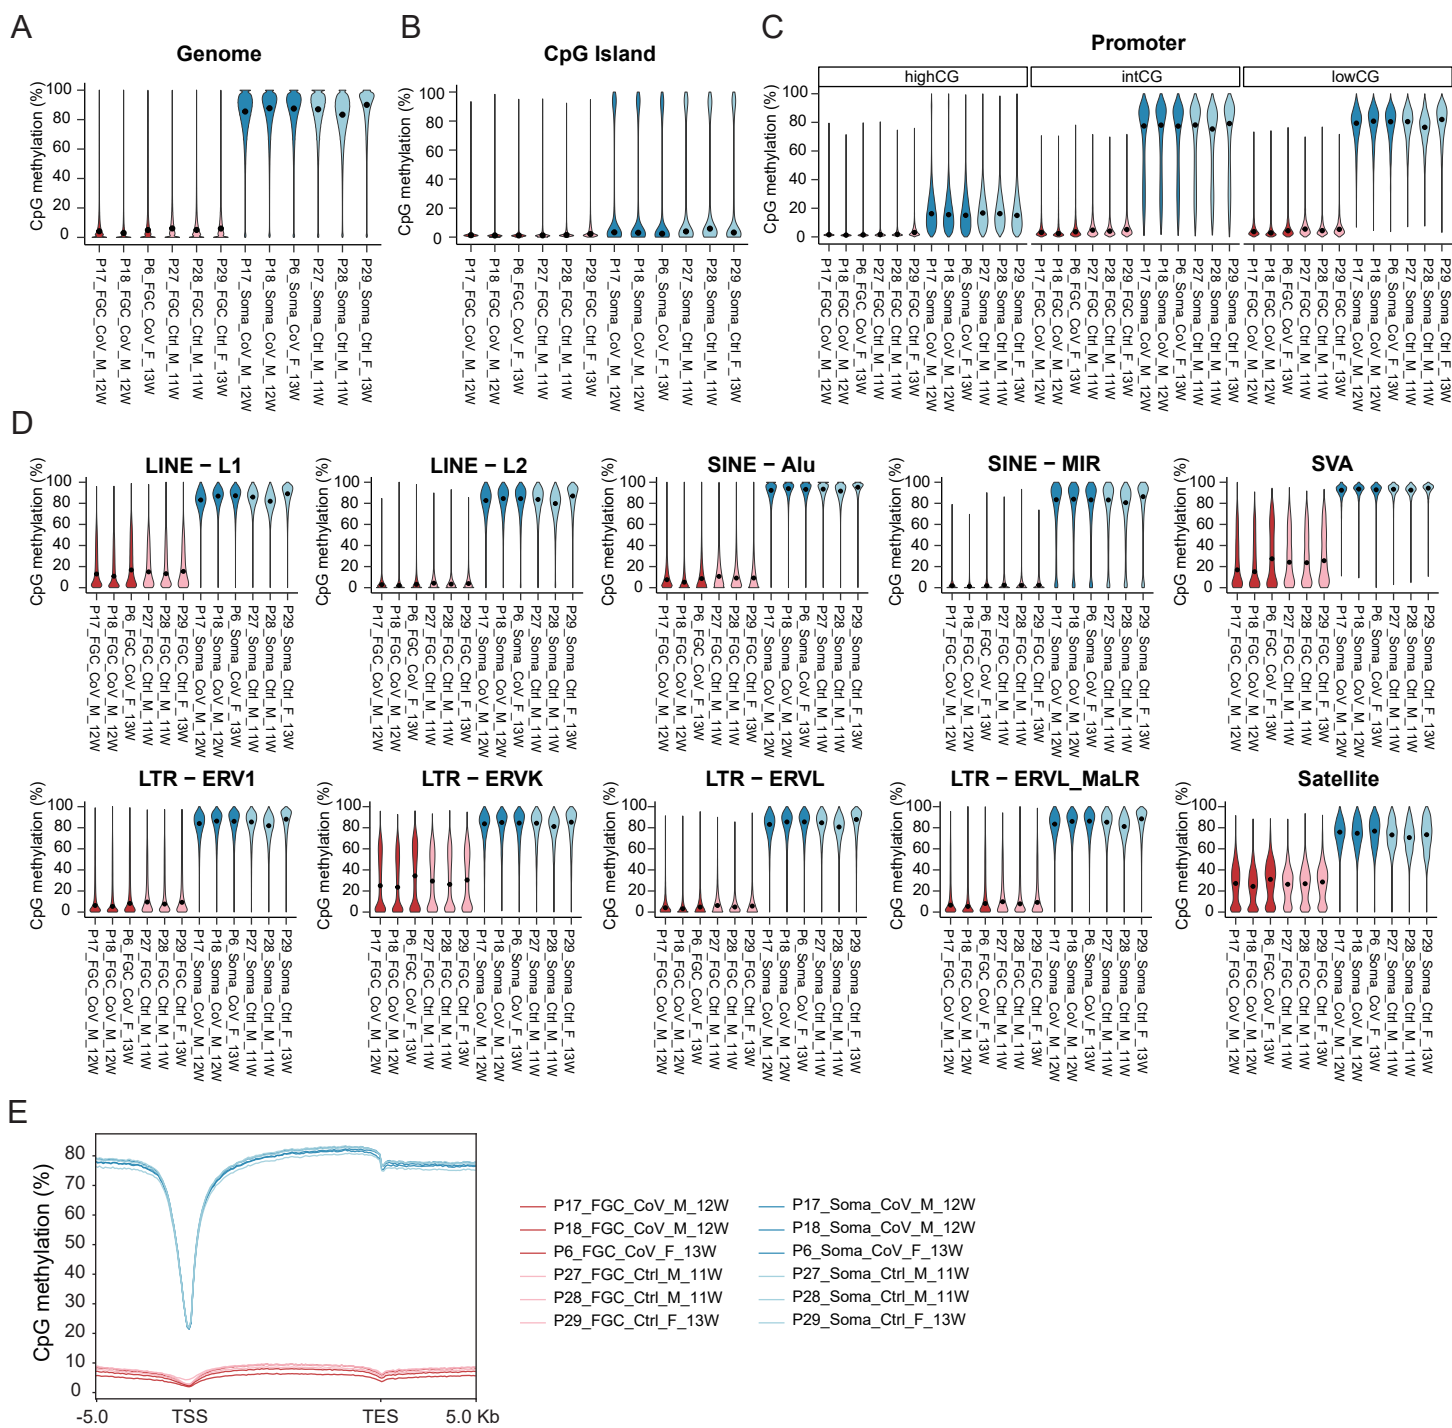

Figure S3

**Figure S3. DNA methylation pattern of human FGCs and gonadal somatic cells following maternal SARS-CoV-2 infection, related to Figure 2, 3.**

**(A - D)** Violin plots showing distribution of CpG methylation level in 500 bp sliding windows of whole genome (A), CpG Islands (B), promoter of genes (C), major human repetitive element classes and families (D) of FGCs and gonadal somatic cells from CoV and Ctrl group. F, female. M, male. W, gestational week at termination.

**(E)** Averaged CpG methylation level profiles of all genes from 5 Kb upstream (-) of transcription start sites (TSSs), through scaled gene bodies to 5 Kb downstream (+) of transcription end sites (TESs) in FGCs and gonadal somatic cells from CoV and Ctrl group. F, female. M, male. W, gestational week at termination.



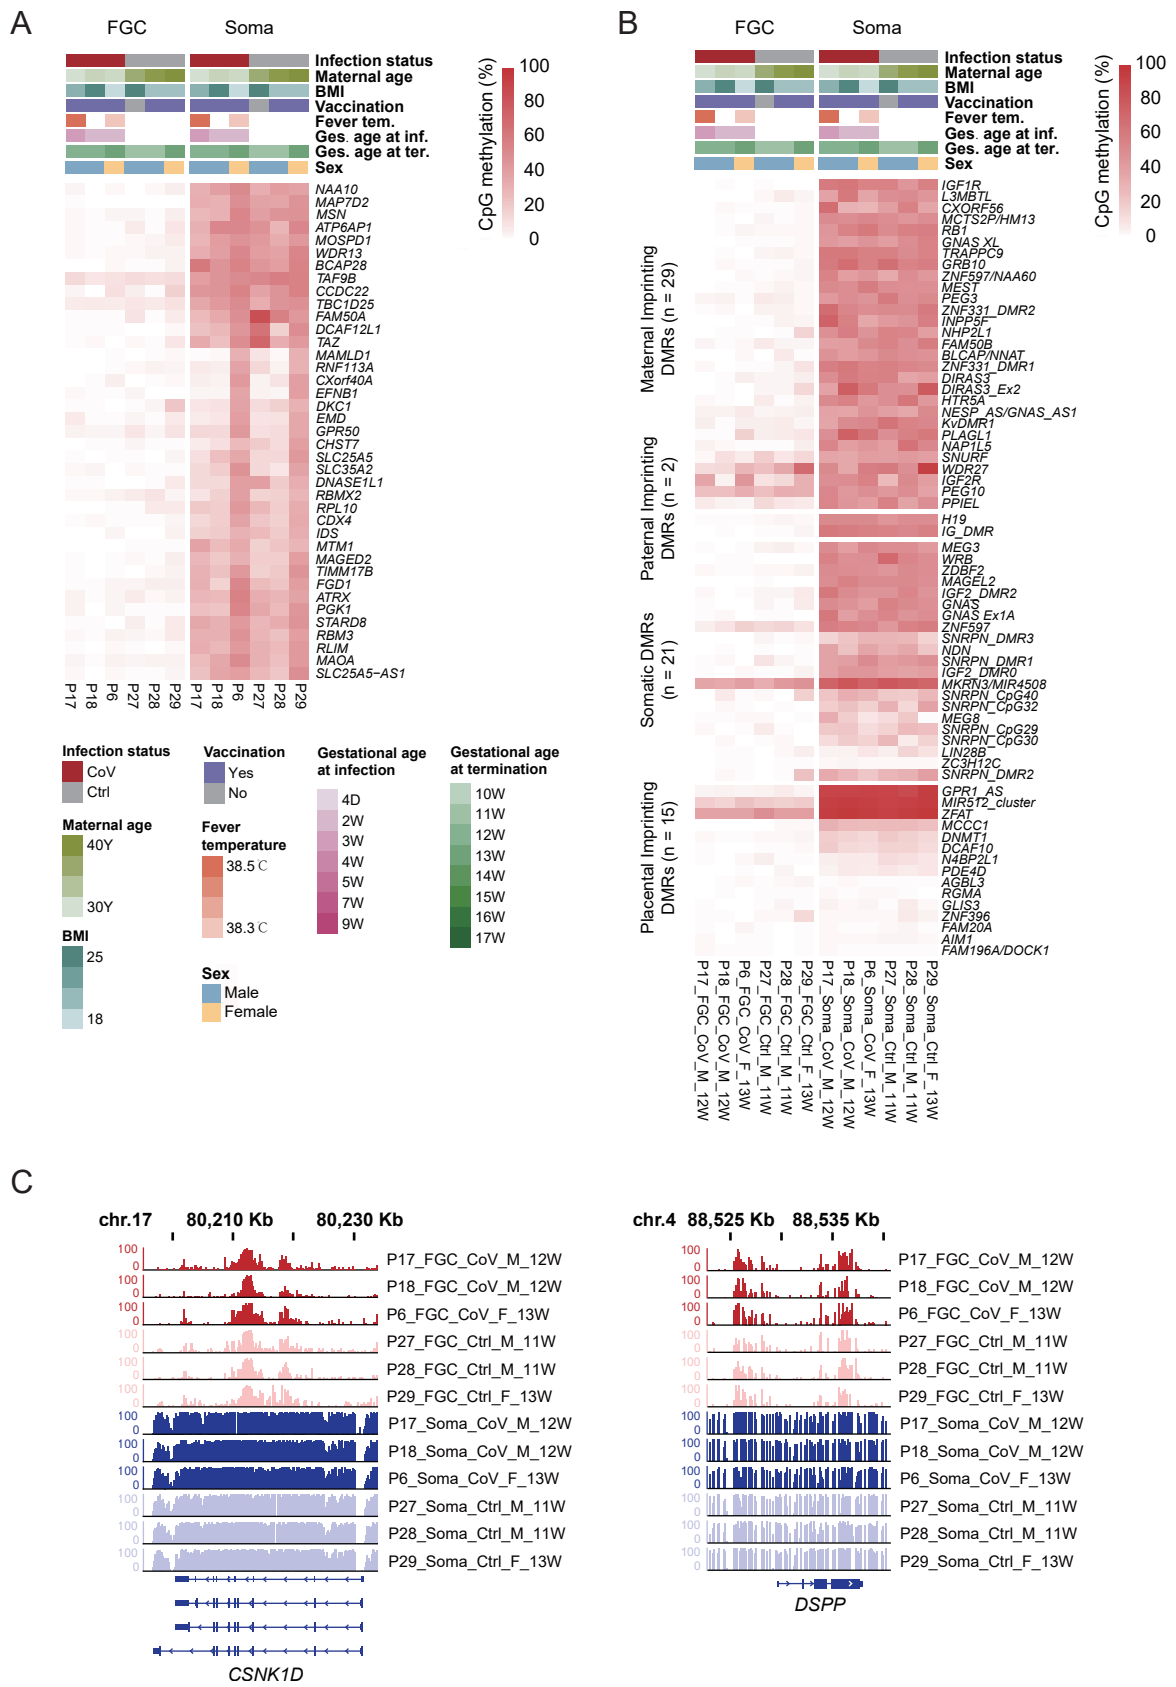

Figure S4

**Figure S4. DNA methylation reprogramming faithfully maintained in human FGCs following maternal SARS-CoV-2 infection, related to Figure 3.**

**(A and B)** DNA methylation dynamics of CGI-containing promoters on X chromosome (A) or imprinted differentially methylated regions (DMRs) (B) of FGCs and gonadal somatic cells from CoV and Ctrl group. The clinical characteristics of these samples were shown above correspondingly. Y, year. W, week. D, day. The heatmaps were ordered by gestational age at termination horizontally in each infection status.

**(C)** IGV plots showing the DNA methylation level profiles of two representative regions that evaded genome-wide DNA demethylation in FGCs (“escapees”). F, female. M, male. W, gestational week at termination.

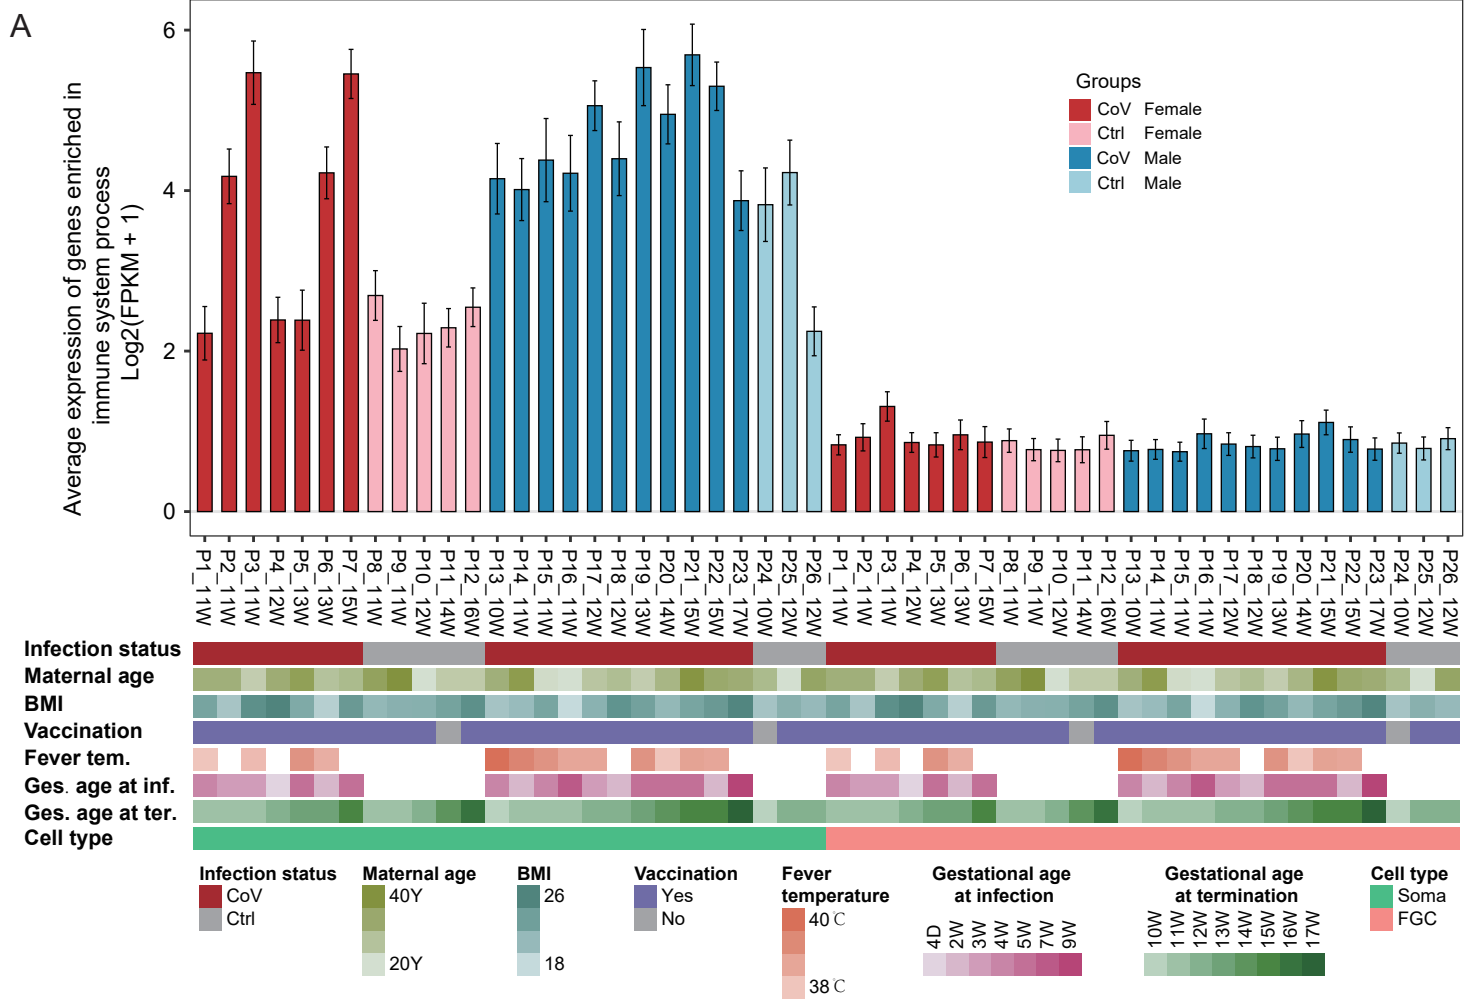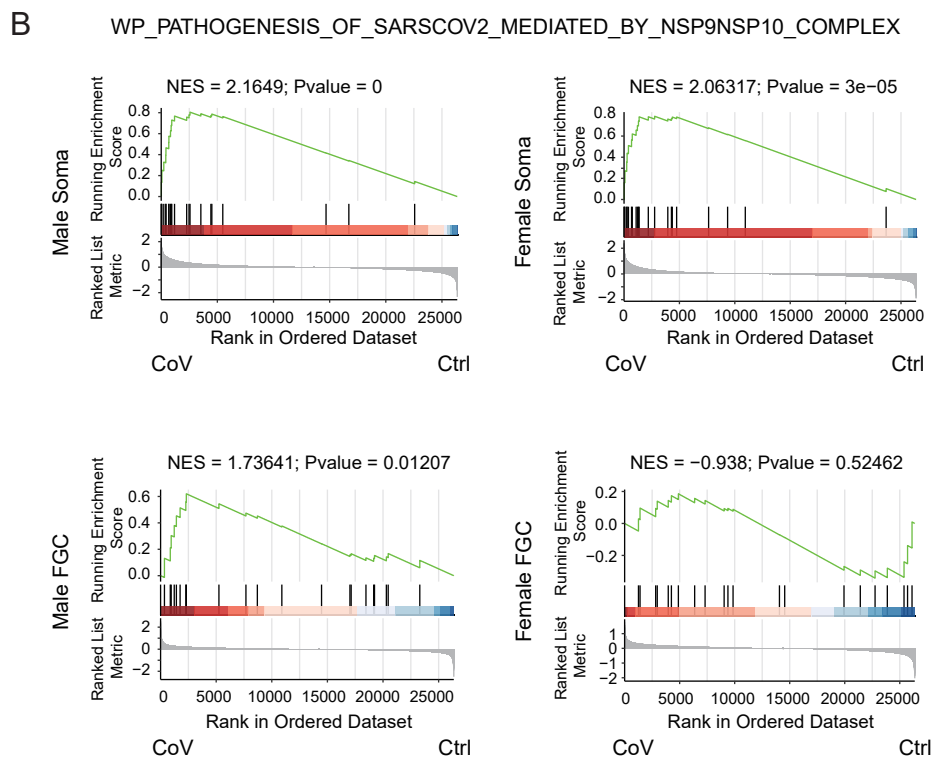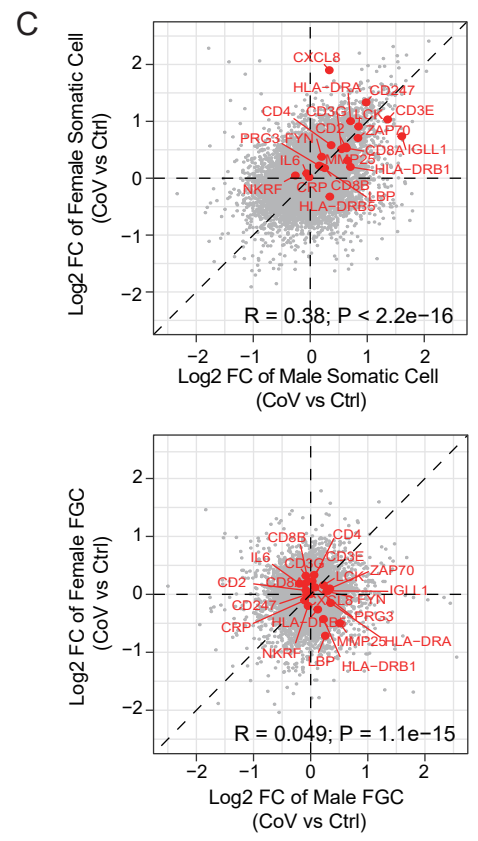

Figure S5

**Figure S5. Extensive immune responses in gonadal niche shield FGCs from maternal SARS-CoV-2 infection, related to Figure 4.**

**(A)** The average expression level of co-upregulated genes in both male and female gonadal somatic cells and FGCs, which enriched in the top GO term “immune system process”. The clinical characteristics of these samples were shown below correspondingly. Y, year. W, week. D, day. The bar plot was ordered by gestational age at termination horizontally in each group.

**(B)** The selected top enriched pathway of Figure 4G was shown by GSEA enrichment plot in male and female gonadal somatic cells and FGCs, respectively. The NES and P value were shown. NES, normalized enrichment score.

**(C)** Scatter plots showing the alternations of gene expression of all genes calculated by CoV group versus Ctrl group in male and female gonadal somatic cells (C, top) and FGCs (C, bottom), respectively. The alternation of gene expression was represented as log<sub>2</sub> fold change (log<sub>2</sub> FC). The representative genes related to the pathways shown in (B) were labeled in red. The Pearson correlation coefficients and the P values were shown. CoV\_Male\_n = 11, Ctrl\_Male\_n = 3, CoV\_Female\_n = 7, Ctrl\_Female\_n = 5.

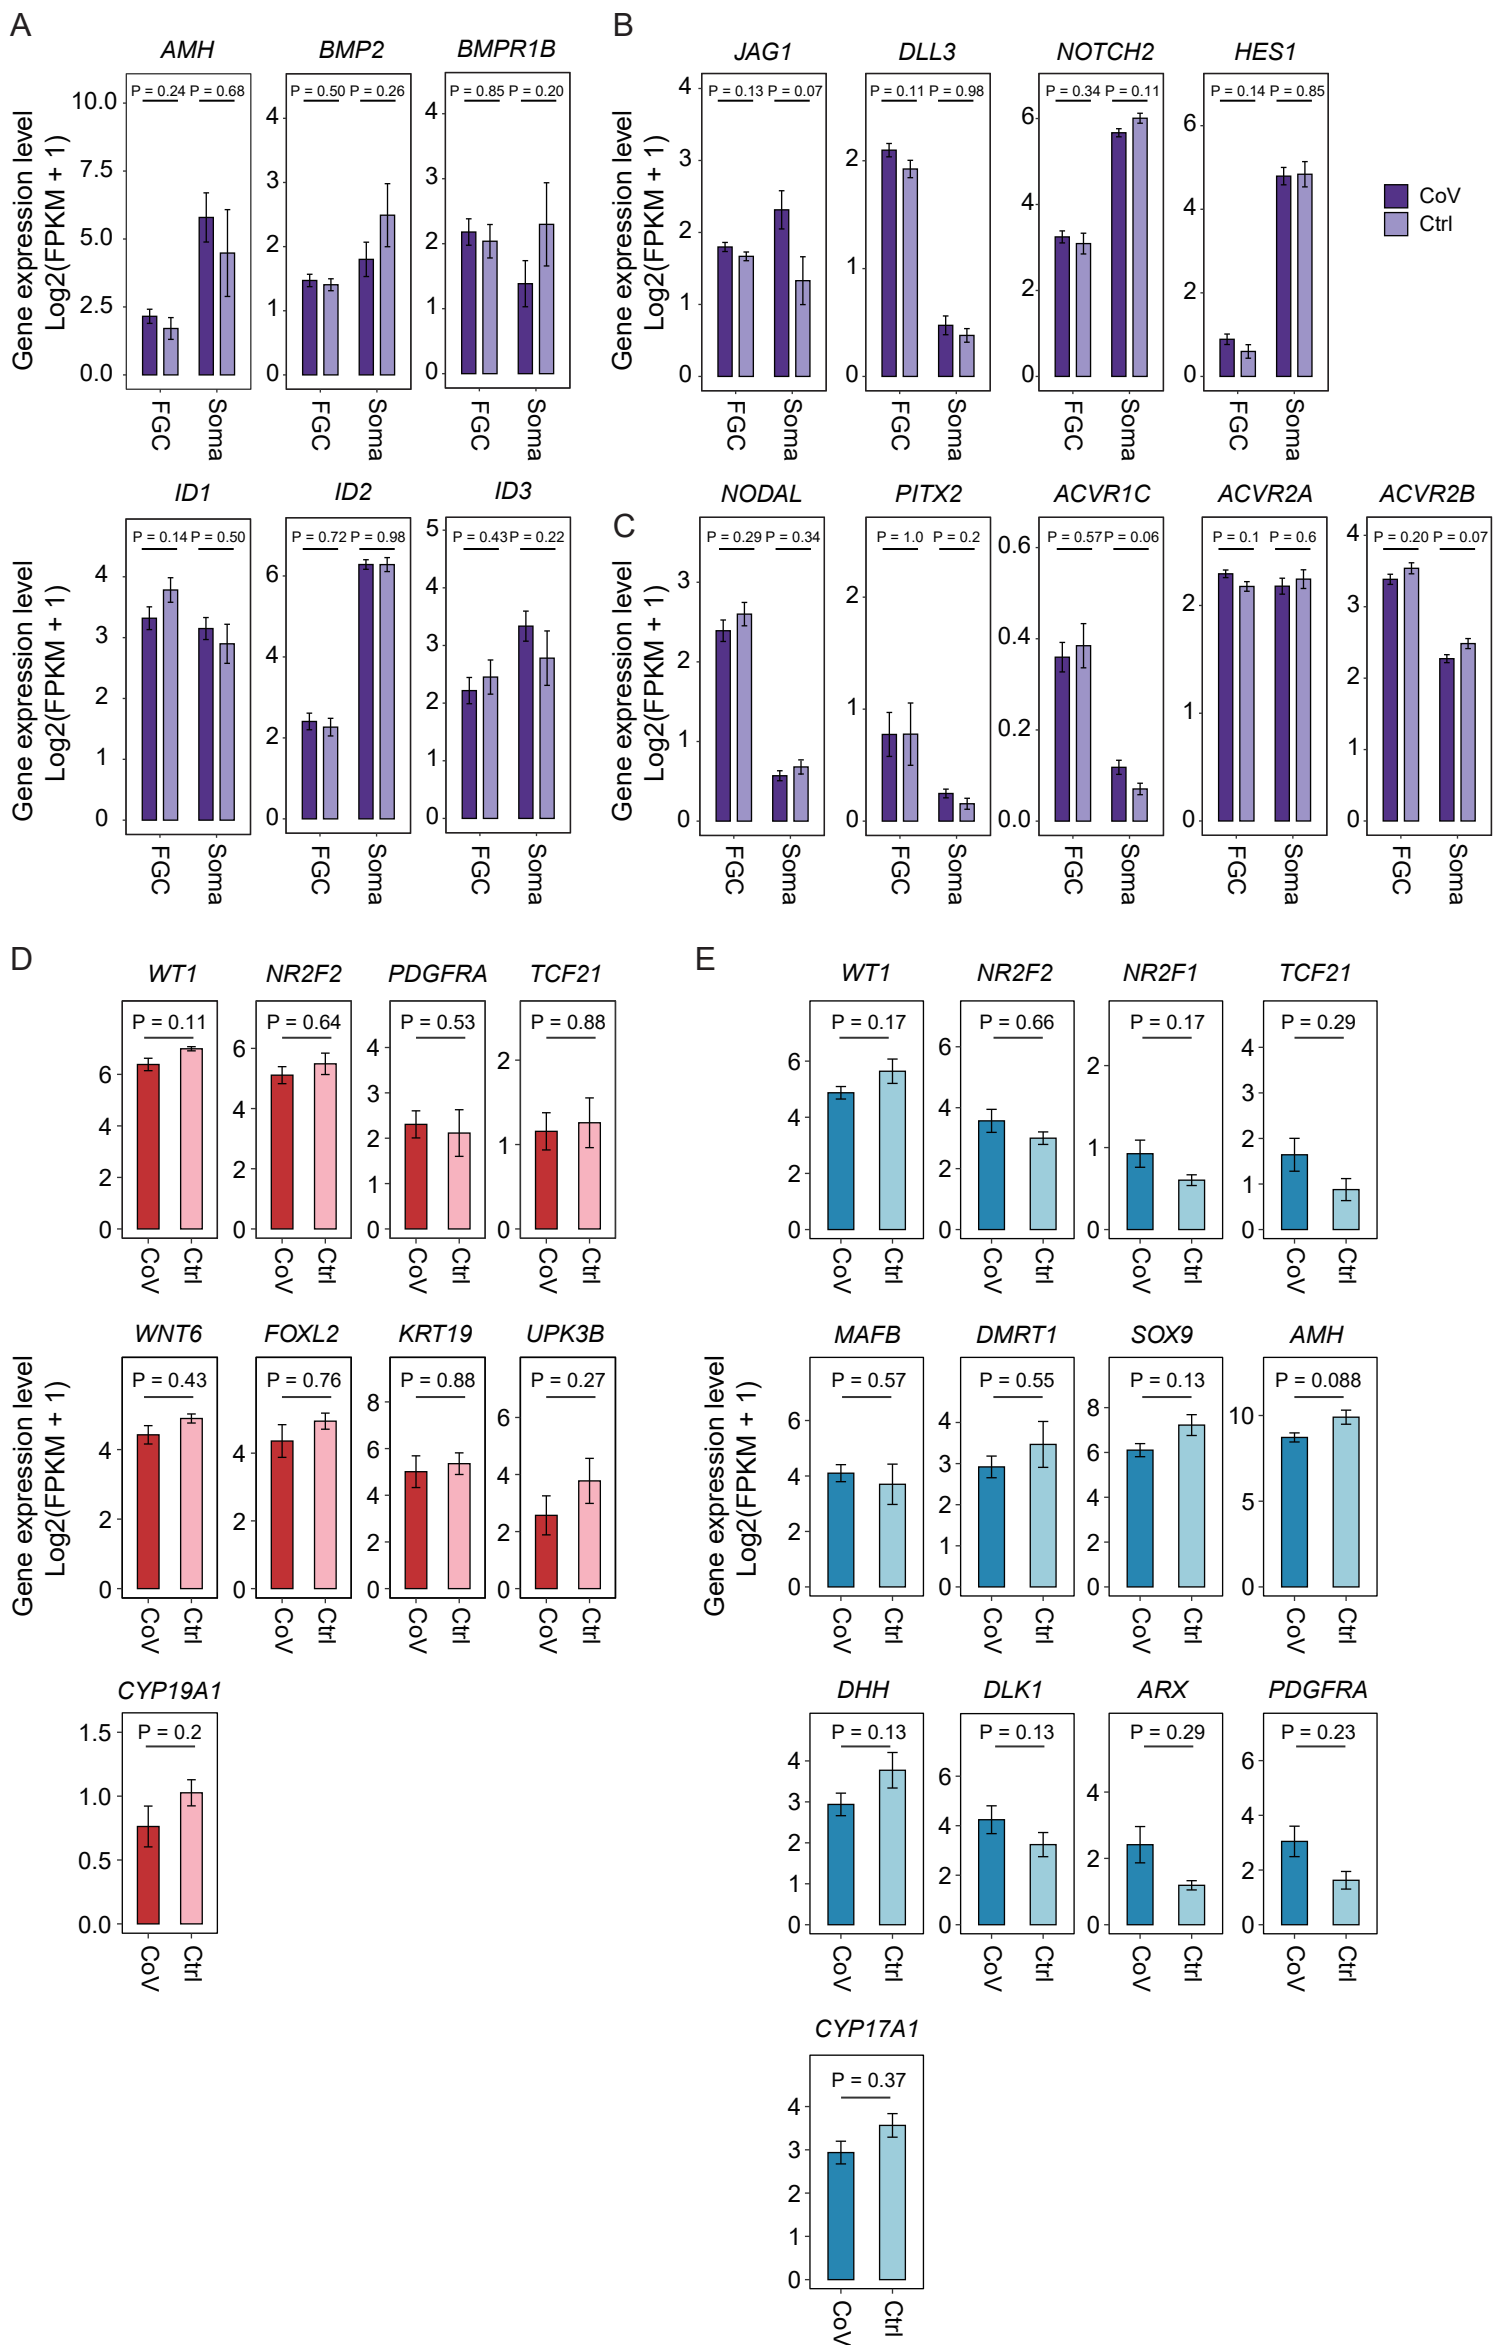

Figure S6

**Figure S6. Human FGC-niche communication was not compromised following maternal SARS-CoV-2 infection, related to Figure 4.**

**(A - C)** Bar plots showing expression level of the specific ligands, receptors, and target genes of the BMP (A), NOTCH (B) and NODAL (C) signaling pathways. The expression level was represented as  $\log_2(\text{FPKM}+1)$ . P values were calculated by Wilcoxon rank sum test. CoV\_n = 18, Ctrl\_n = 8.

**(D and E)** Bar plots showing expression level of selected female (D) and male (E) gonadal somatic marker genes. The expression level was represented as  $\log_2(\text{FPKM}+1)$ . The Student's *t*-test was performed to examine the statistical difference between the CoV group and Ctrl group. Red color scheme, female. Blue color scheme, male. CoV\_Female\_n = 7, Ctrl\_Female\_n = 5, CoV\_Male\_n = 11, Ctrl\_Male\_n = 3.
